# Supplementary material
Source: Springer Nature journal article supplement (https://www.springermedizin.de/resource/supplementary/13075_2012_3634_MOESM3_ESM.pdf/9694998)

## TLR9/CPG

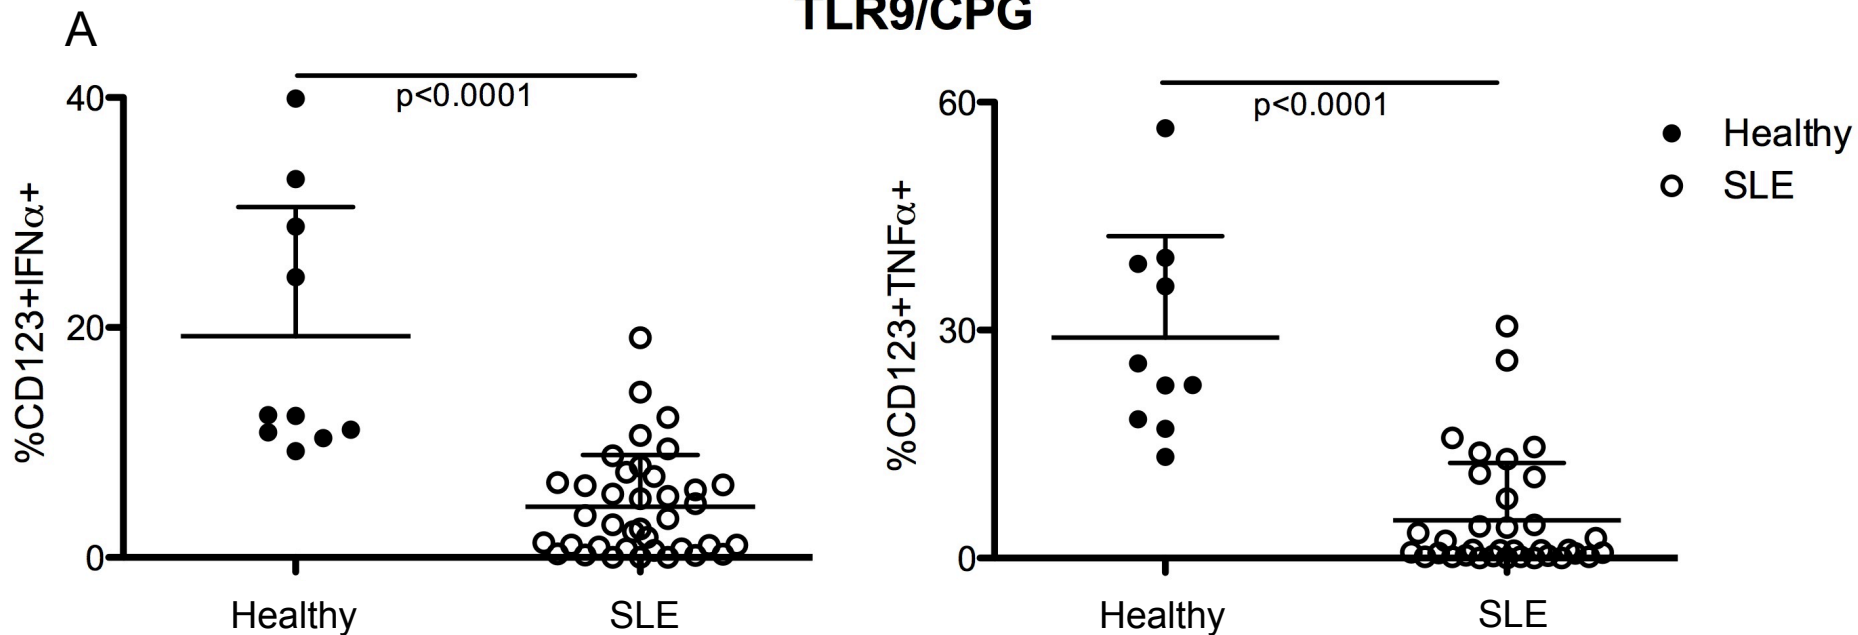

## TLR7/Imiquimod

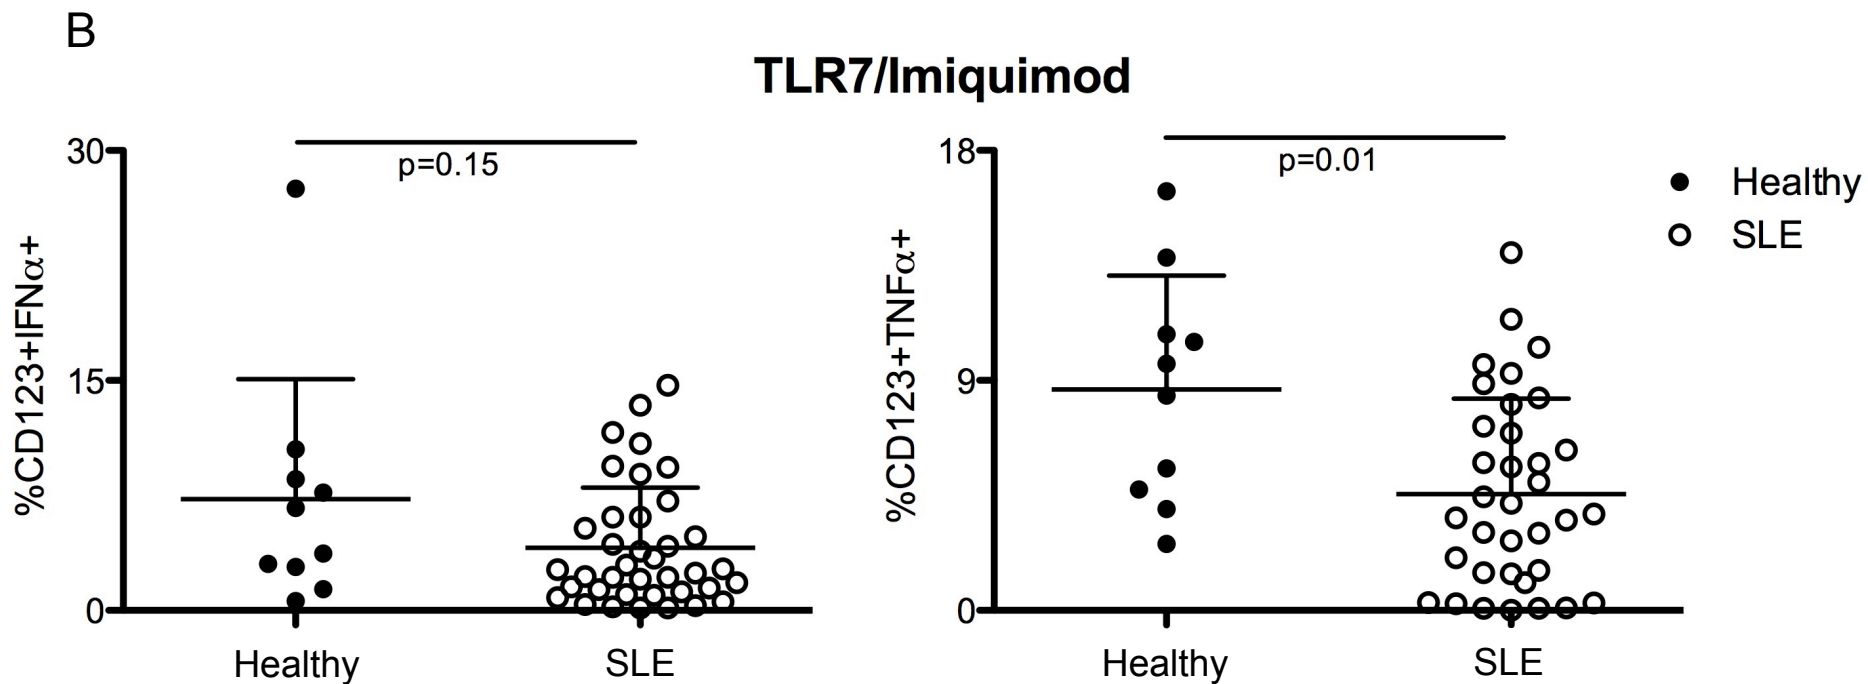

Supplement: MOESM3 [file 9694998]
